# Supplementary material for: Oligogenic heterozygous inheritance of sperm abnormalities in mouse
Source: eLife. 2022 Apr 22;11:e75373. doi: 10.7554/eLife.75373 (PMC9071268; doi:10.7554/eLife.75373)
Supplement: Figure 5—source data 1. [file elife-75373-fig5-data1.xlsx]

## Sheet: Abnormal cells (%)
Wild type (n=16)	Cfap44 (n=7)	Cfap44/Cfap43 (n=10)	Cfap44/Cfap43/Armc2 (n=4)	Cfap44/Cfap43/Armc2/Ccdc146 (n=3)
12	25	31	28	48
11	29	32	31	37
8	24	37	34	42
4	19	36	38
10	22	25
12	25	34
12	23	31
14		22
11		21
7		30
8
11
5
7
14
11

## Sheet: Head abnormalities (%)
Wild type (n=16)	Cfap44 (n=7)	Cfap44/Cfap43 (n=10)	Cfap44/Cfap43/Armc2 (n=4)	Cfap44/Cfap43/Armc2/Ccdc146 (n=3)
11	17	22	17	46
8	27	28	29	36
3	20	29	32	39
3	16	22	36
7	14	20
9	19	27
7	21	20
10		20
8		18
5		25
3
8
4
3
9
7

## Sheet: Flagellum abnormalities (%)
Wild type (n=16)	Cfap44 (n=7)	Cfap44/Cfap43 (n=10)	Cfap44/Cfap43/Armc2 (n=4)	Cfap44/Cfap43/Armc2/Ccdc146 (n=3)
3	8	7	15	7
3	6	6	9	5
5	4	11	5	9
2	8	17	6
5	12	4
3	8	10
5	3	14
3		4
1		4
2		6
5		8
5		9
2		9
4		4
6		5
4		9
		6
		4
		4

## Sheet: Motility (%)
Wild-type (n=14)	Cfap44 (n=11)	Cfap44/Cfap43 (n=10)	Cfap44/Cfap43/Armc2 (n=5)	Cfap44/Cfap43/Armc2/Ccdc146 (n=3)
47.2	30.8	55.4	35.9	20.1
50.2	43	26.3	35.4	37.5
28.1	41	13.3	37.5	29.8
52.8	47	33.6	31.4
10.8	32.9	27.7	49.5
63	32.3	31.1
16.9	23.2	22.3
27.3	26	39.5
49	43	35.1
35	33.3	49.7
41.4	35.35
46.2
39.1
32.7

## Sheet: VAP (µm per second)
Wild-type (n=14)	Cfap44 (n=11)	Cfap44/Cfap43 (n=10)	Cfap44/Cfap43/Armc2 (n=5)	Cfap44/Cfap43/Armc2/Ccdc146 (n=3)
84.26	42.69	88.5	57.31	28.59
83.23	66.72	37.66	52.93	56.58
54	68.71	18.28	68.41	38.36
107.2	85.4	50.97	45.54
101.9	104.5	41.92	70.41
113.7	105.9	46.1
104.3	89.3	29.24
113.5	105.9	61.59
144.2	111.71	51.02
111.1	95.74	86.35
106.2	102.11
63.68
64.13
40.91

## Sheet: VSL (µm per second)
Wild-type (n=14)	Cfap44 (n=11)	Cfap44/Cfap43 (n=10)	Cfap44/Cfap43/Armc2 (n=5)	Cfap44/Cfap43/Armc2/Ccdc146 (n=3)
76	36.87	78.94	49.53	22.82
72.13	54.92	33.84	47.22	46.36
48.25	55.37	15.33	62.81	31.12
99.07	74.9	45.26	39.53
93.9	96.3	37.25	60.66
90.8	96.1	40.14
92.7	81.4	25.46
102.8	94.5	53.67
121.6	84.15	42.98
99.6	66.62	66.75
97.6	74.41
54.89
55.73
36.25
