# Supplementary material for: Oligogenic heterozygous inheritance of sperm abnormalities in mouse
Source: eLife. 2022 Apr 22;11:e75373. doi: 10.7554/eLife.75373 (PMC9071268; doi:10.7554/eLife.75373)
Supplement: Figure 6—source data 1. [file elife-75373-fig6-data1.xlsx]

## Sheet: Abnormal cells (%)
Wild type (n=16)	1 gene (n=22)	2 genes (n=19)	3 genes (n=5)	4 genes (n=3)						Genotype	2 genes (n=19)			Genotype	3 genes (n=5)
12	25	31	28	48						Cfap43+/- & Cfap44+/-	31			Cfap43+/- & Cfap44+/- & Armc2+/-	28
11	29	32	31	37						Cfap43+/- & Cfap44+/-	32			Cfap43+/- & Cfap44+/- & Armc2+/-	31
8	24	37	26	42						Cfap43+/- & Cfap44+/-	37			Cfap43+/- & Cfap44+/- & Armc2+/-	34
4	19	36	34							Cfap43+/- & Cfap44+/-	36			Cfap43+/- & Cfap44+/- & Armc2+/-	38
10	22	25	38							Cfap43+/- & Cfap44+/-	25			Cfap43+/- & Armc2+/- & Ccdc146+/-	26
12	25	34								Cfap43+/- & Cfap44+/-	34
12	12	31								Cfap43+/- & Cfap44+/-	31
14	18	22								Cfap43+/- & Cfap44+/-	22
11	17	21								Cfap43+/- & Cfap44+/-	21
7	15	30								Cfap43+/- & Cfap44+/-	30
8	12	22								Cfap44+/- & Armc2+/-	22
11	13	17								Cfap44+/- & Armc2+/-	17
5	11	16								Cfap44+/- & Armc2+/-	16
7	18	18								Cfap44+/- & Armc2+/-	18
14	11	20								Cfap44+/- & Armc2+/-	20
11	15	23								Cfap44+/- & Armc2+/-	23
	8	16								Cfap44+/- & Armc2+/-	16
	23	10								Cfap44+/- & Armc2+/-	10
	4	26								Cfap44+/- & Armc2+/-	26
	5
	7
	4

## Sheet: Head abnormalities (%)
Wild type (n=16)	1 gene (n=22)	2 genes (n=19)	3 genes (n=5)	4 genes (n=3)						Genotype	2 genes (n=19)			Genotype	3 genes (n=5)
11	17	22	17	46						Cfap43+/- & Cfap44+/-	22			Cfap43+/- & Cfap44+/- & Armc2+/-	17
8	27	28	29	36						Cfap43+/- & Cfap44+/-	28			Cfap43+/- & Cfap44+/- & Armc2+/-	29
3	20	29	24	39						Cfap43+/- & Cfap44+/-	29			Cfap43+/- & Cfap44+/- & Armc2+/-	32
3	16	22	32							Cfap43+/- & Cfap44+/-	22			Cfap43+/- & Cfap44+/- & Armc2+/-	36
7	14	20	36							Cfap43+/- & Cfap44+/-	20			Cfap43+/- & Armc2+/- & Ccdc146+/-	24
9	19	27								Cfap43+/- & Cfap44+/-	27
7	9	20								Cfap43+/- & Cfap44+/-	20
10	11	20								Cfap43+/- & Cfap44+/-	20
8	12	18								Cfap43+/- & Cfap44+/-	18
5	11	25								Cfap43+/- & Cfap44+/-	25
3	4	14								Cfap44+/- & Armc2+/-	14
8	3	10								Cfap44+/- & Armc2+/-	10
4	6	11								Cfap44+/- & Armc2+/-	11
3	8	14								Cfap44+/- & Armc2+/-	14
9	4	16								Cfap44+/- & Armc2+/-	16
7	8	14								Cfap44+/- & Armc2+/-	14
	4	11								Cfap44+/- & Armc2+/-	11
	21	6								Cfap44+/- & Armc2+/-	6
	3	23								Cfap44+/- & Armc2+/-	23
	3
	4
	1

## Sheet: Flagellum abnormalities (%)
Wild type (n=16)	1 gene (n=22)	2 genes (n=19)	3 genes (n=5)	4 genes (n=3)						Genotype	2 genes (n=19)			Genotype	3 genes (n=5)
3	8	7	15	7						Cfap43+/- & Cfap44+/-	7			Cfap43+/- & Cfap44+/- & Armc2+/-	15
3	6	6	9	5						Cfap43+/- & Cfap44+/-	6			Cfap43+/- & Cfap44+/- & Armc2+/-	9
5	4	11	2	9						Cfap43+/- & Cfap44+/-	11			Cfap43+/- & Cfap44+/- & Armc2+/-	5
2	8	17	5							Cfap43+/- & Cfap44+/-	17			Cfap43+/- & Cfap44+/- & Armc2+/-	6
5	12	4	6							Cfap43+/- & Cfap44+/-	4			Cfap43+/- & Armc2+/- & Ccdc146+/-	2
3	8	10								Cfap43+/- & Cfap44+/-	10
5	5	14								Cfap43+/- & Cfap44+/-	14
3	7	4								Cfap43+/- & Cfap44+/-	4
1	9	4								Cfap43+/- & Cfap44+/-	4
2	4	6								Cfap43+/- & Cfap44+/-	6
5	8	8								Cfap44+/- & Armc2+/-	8
5	10	9								Cfap44+/- & Armc2+/-	9
2	5	9								Cfap44+/- & Armc2+/-	9
4	13	4								Cfap44+/- & Armc2+/-	4
6	7	5								Cfap44+/- & Armc2+/-	5
4	7	9								Cfap44+/- & Armc2+/-	9
	5	6								Cfap44+/- & Armc2+/-	6
	3	4								Cfap44+/- & Armc2+/-	4
	1	4								Cfap44+/- & Armc2+/-	4
	2
	3
	3

## Sheet: Motility (%)
Wild type (n=14)	1 gene (n=31)	2 genes (n=26)	3 genes (n=8)	4 genes (n=3)						Genotype	2 genes (n=26)			Genotype	3 genes (n=8)
47.2	30.8	55.4	35.9	20.1						Cfap43+/- & Cfap44+/-	55.4			Cfap43+/- & Cfap44+/- & Armc2+/-	35.9
50.2	43	26.3	35.4	37.5						Cfap43+/- & Cfap44+/-	26.3			Cfap43+/- & Cfap44+/- & Armc2+/-	35.4
28.1	41	13.3	37.5	29.8						Cfap43+/- & Cfap44+/-	13.3			Cfap43+/- & Cfap44+/- & Armc2+/-	37.5
52.8	47	33.6	31.4							Cfap43+/- & Cfap44+/-	33.6			Cfap43+/- & Cfap44+/- & Armc2+/-	31.4
10.8	32.9	27.7	49.5							Cfap43+/- & Cfap44+/-	27.7			Cfap43+/- & Cfap44+/- & Armc2+/-	49.5
63	32.3	31.1	36.7							Cfap43+/- & Cfap44+/-	31.1			Cfap44+/- & Armc2+/- & Ccdc146+/-	36.7
16.9	23.2	22.3	26.8							Cfap43+/- & Cfap44+/-	22.3			Cfap43+/- & Armc2+/- & Ccdc146+/-	26.8
27.3	26	39.5	24.3							Cfap43+/- & Cfap44+/-	39.5			Cfap43+/- & Armc2+/- & Ccdc146+/-	24.3
49	43	35.1								Cfap43+/- & Cfap44+/-	35.1
35	33.3	49.7								Cfap43+/- & Cfap44+/-	49.7
41.4	35.35	48								Cfap44+/- & Armc2+/-	48
46.2	36.7	27.4								Cfap44+/- & Armc2+/-	27.4
39.1	24.4	16.6								Cfap44+/- & Armc2+/-	16.6
32.7	45.8	40.5								Cfap44+/- & Armc2+/-	40.5
	46.4	48.9								Cfap44+/- & Armc2+/-	48.9
	34	21.6								Cfap44+/- & Armc2+/-	21.6
	45	38.6								Cfap44+/- & Armc2+/-	38.6
	17	34.2								Cfap43+/- & Armc2+/-	34.2
	13.1	25.6								Cfap43+/- & Armc2+/-	25.6
	33	20.2								Cfap43+/- & Armc2+/-	20.2
	16.2	29.5								Cfap43+/- & Armc2+/-	29.5
	11.4	33.8								Cfap43+/- & Armc2+/-	33.8
	18.4	57								Cfap43+/- & Armc2+/-	57
	19.9	38.7								Cfap43+/- & Armc2+/-	38.7
	11	30.4								Armc2+/- & Ccdc146+/-	30.4
	66.3	36.8								Cfap43+/- & Ccdc146+/-	36.8
	57.4
	51.2
	48.1
	47.1
	44.4

## Sheet: VAP (µm per second)
Wild type (n=14)	1 gene (n=31)	2 genes (n=26)	3 genes (n=8)	4 genes (n=3)						Genotype	2 genes (n=26)			Genotype	3 genes (n=8)
84.26	42.69	88.5	57.31	28.59						Cfap43+/- & Cfap44+/-	88.5			Cfap43+/- & Cfap44+/- & Armc2+/-	57.31
83.23	66.72	37.66	52.93	56.58						Cfap43+/- & Cfap44+/-	37.66			Cfap43+/- & Cfap44+/- & Armc2+/-	52.93
54	68.71	18.28	68.41	38.36						Cfap43+/- & Cfap44+/-	18.28			Cfap43+/- & Cfap44+/- & Armc2+/-	68.41
107.2	85.4	50.97	45.54							Cfap43+/- & Cfap44+/-	50.97			Cfap43+/- & Cfap44+/- & Armc2+/-	45.54
101.9	104.5	41.92	70.41							Cfap43+/- & Cfap44+/-	41.92			Cfap43+/- & Cfap44+/- & Armc2+/-	70.41
113.7	105.9	46.1	44.74							Cfap43+/- & Cfap44+/-	46.1			Cfap44+/- & Armc2+/- & Ccdc146+/-	44.74
104.3	89.3	29.24	32.73							Cfap43+/- & Cfap44+/-	29.24			Cfap43+/- & Armc2+/- & Ccdc146+/-	32.73
113.5	105.9	61.59	31.64							Cfap43+/- & Cfap44+/-	61.59			Cfap43+/- & Armc2+/- & Ccdc146+/-	31.64
144.2	111.71	51.02								Cfap43+/- & Cfap44+/-	51.02
111.1	95.74	86.35								Cfap43+/- & Cfap44+/-	86.35
106.2	102.11	77.84								Cfap44+/- & Armc2+/-	77.84
63.68	55.02	40.42								Cfap44+/- & Armc2+/-	40.42
64.13	28.87	20.88								Cfap44+/- & Armc2+/-	20.88
40.91	70.47	60.67								Cfap44+/- & Armc2+/-	60.67
	62.57	86.35								Cfap44+/- & Armc2+/-	86.35
	90.9	40.81								Cfap44+/- & Armc2+/-	40.81
	70.5	79.65								Cfap44+/- & Armc2+/-	79.65
	125.6	47.67								Cfap43+/- & Armc2+/-	47.67
	124.2	41.75								Cfap43+/- & Armc2+/-	41.75
	139.9	34.06								Cfap43+/- & Armc2+/-	34.06
	84.5	40.32								Cfap43+/- & Armc2+/-	40.32
	114.7	51.6								Cfap43+/- & Armc2+/-	51.6
	114.62	101.37								Cfap43+/- & Armc2+/-	101.37
	107.26	59.73								Cfap43+/- & Armc2+/-	59.73
	121	45.4								Armc2+/- & Ccdc146+/-	45.4
	129.9	49.16								Cfap43+/- & Ccdc146+/-	49.16
	110.11
	91.7
	73.91
	82.35
	72.23

## Sheet: VSL (µm per second)
Wild type (n=14)	1 gene (n=31)	2 genes (n=26)	3 genes (n=8)	4 genes (n=3)						Genotype	2 genes (n=26)			Genotype	3 genes (n=8)
76	36.87	78.94	49.53	22.82						Cfap43+/- & Cfap44+/-	78.94			Cfap43+/- & Cfap44+/- & Armc2+/-	49.53
72.13	54.92	33.84	47.22	46.36						Cfap43+/- & Cfap44+/-	33.84			Cfap43+/- & Cfap44+/- & Armc2+/-	47.22
48.25	55.37	15.33	62.81	31.12						Cfap43+/- & Cfap44+/-	15.33			Cfap43+/- & Cfap44+/- & Armc2+/-	62.81
99.07	74.9	45.26	39.53							Cfap43+/- & Cfap44+/-	45.26			Cfap43+/- & Cfap44+/- & Armc2+/-	39.53
93.9	96.3	37.25	60.66							Cfap43+/- & Cfap44+/-	37.25			Cfap43+/- & Cfap44+/- & Armc2+/-	60.66
90.8	96.1	40.14	37.49							Cfap43+/- & Cfap44+/-	40.14			Cfap44+/- & Armc2+/- & Ccdc146+/-	37.49
92.7	81.4	25.46	27.04							Cfap43+/- & Cfap44+/-	25.46			Cfap43+/- & Armc2+/- & Ccdc146+/-	27.04
102.8	94.5	53.67	27.35							Cfap43+/- & Cfap44+/-	53.67			Cfap43+/- & Armc2+/- & Ccdc146+/-	27.35
121.6	84.15	42.98								Cfap43+/- & Cfap44+/-	42.98
99.6	66.62	66.75								Cfap43+/- & Cfap44+/-	66.75
97.6	74.41	66.95								Cfap44+/- & Armc2+/-	66.95
54.89	45.1	34.74								Cfap44+/- & Armc2+/-	34.74
55.73	25.24	17.05								Cfap44+/- & Armc2+/-	17.05
36.25	59.7	53.54								Cfap44+/- & Armc2+/-	53.54
	51.54	77.58								Cfap44+/- & Armc2+/-	77.58
	74.7	38.09								Cfap44+/- & Armc2+/-	38.09
	45.3	74.41								Cfap44+/- & Armc2+/-	74.41
	103.5	41.03								Cfap43+/- & Armc2+/-	41.03
	109.9	36.49								Cfap43+/- & Armc2+/-	36.49
	123.4	28.49								Cfap43+/- & Armc2+/-	28.49
	73.2	34.89								Cfap43+/- & Armc2+/-	34.89
	99.3	43.96								Cfap43+/- & Armc2+/-	43.96
	87.73	93.49								Cfap43+/- & Armc2+/-	93.49
	77.8	52.69								Cfap43+/- & Armc2+/-	52.69
	111.5	38.43								Armc2+/- & Ccdc146+/-	38.43
	116.53	42.53								Cfap43+/- & Ccdc146+/-	42.53
	102.84
	83.04
	61.86
	71.78
	62.96
