# Supplementary material for: Oligogenic heterozygous inheritance of sperm abnormalities in mouse
Source: eLife. 2022 Apr 22;11:e75373. doi: 10.7554/eLife.75373 (PMC9071268; doi:10.7554/eLife.75373)
Supplement: Figure 7—source data 1. [file elife-75373-fig7-data1.xlsx]

## Sheet: Testis weight (gr)
Wild type (n=8)	1 gene (n=14)	2 genes (n=26)	3 genes (n=8)	4 genes (n=3)						Genotype	2 genes (n=26)			Genotype	3 genes (n=8)
0.0938	0.076	0.0711	0.1302	0.0916						Cfap43+/- & Cfap44+/-	0.0711			Cfap43+/- & Cfap44+/- & Armc2+/-	0.1302
0.0921	0.0858	0.0855	0.1174	0.118						Cfap43+/- & Cfap44+/-	0.0855			Cfap43+/- & Cfap44+/- & Armc2+/-	0.1174
0.1089	0.0744	0.0747	0.0938	0.0987						Cfap43+/- & Cfap44+/-	0.0747			Cfap43+/- & Cfap44+/- & Armc2+/-	0.0938
0.1	0.1085	0.0749	0.0921							Cfap43+/- & Cfap44+/-	0.0749			Cfap43+/- & Cfap44+/- & Armc2+/-	0.0921
0.0921	0.085	0.0905	0.0921							Cfap43+/- & Cfap44+/-	0.0905			Cfap43+/- & Cfap44+/- & Armc2+/-	0.0921
0.0927	0.1196	0.081	0.0922							Cfap43+/- & Cfap44+/-	0.081			Cfap44+/- & Armc2+/- & Ccdc146+/-	0.0922
0.0933	0.1108	0.08	0.1146							Cfap43+/- & Cfap44+/-	0.08			Cfap43+/- & Armc2+/- & Ccdc146+/-	0.1146
0.0988	0.0692	0.1313	0.1149							Cfap43+/- & Cfap44+/-	0.1313			Cfap43+/- & Armc2+/- & Ccdc146+/-	0.1149
	0.0889	0.0949								Cfap43+/- & Cfap44+/-	0.0949
	0.0972	0.0852								Cfap43+/- & Cfap44+/-	0.0852
	0.0925	0.1187								Cfap44+/- & Armc2+/-	0.1187
	0.1025	0.1078								Cfap44+/- & Armc2+/-	0.1078
	0.1193	0.1098								Cfap44+/- & Armc2+/-	0.1098
	0.0985	0.1211								Cfap44+/- & Armc2+/-	0.1211
		0.0997								Cfap44+/- & Armc2+/-	0.0997
		0.0869								Cfap44+/- & Armc2+/-	0.0869
		0.0978								Cfap44+/- & Armc2+/-	0.0978
		0.1304								Cfap43+/- & Armc2+/-	0.1304
		0.1069								Cfap43+/- & Armc2+/-	0.1069
		0.1273								Cfap43+/- & Armc2+/-	0.1273
		0.0995								Cfap43+/- & Armc2+/-	0.0995
		0.1046								Cfap43+/- & Armc2+/-	0.1046
		0.1223								Cfap43+/- & Armc2+/-	0.1223
		0.1026								Cfap43+/- & Armc2+/-	0.1026
		0.1329								Cfap43+/- & Ccdc146+/-	0.1329
		0.1002								Armc2+/- & Ccdc146+/-	0.1002

## Sheet: Concentration (10^6 per mL)
Wild type (n=15)	1 gene (n=32)	2 genes (n=26)	3 genes (n=8)	4 genes (n=3)						Genotype	2 genes (n=26)			Genotype	3 genes (n=8)
12.5	15.75	21.8	22	18						Cfap43+/- & Cfap44+/-	21.8			Cfap43+/- & Cfap44+/- & Armc2+/-	22
9	8.5	17.6	8	22						Cfap43+/- & Cfap44+/-	17.6			Cfap43+/- & Cfap44+/- & Armc2+/-	8
13.6	5	15	16	15						Cfap43+/- & Cfap44+/-	15			Cfap43+/- & Cfap44+/- & Armc2+/-	16
16.5	10	18.4	13							Cfap43+/- & Cfap44+/-	18.4			Cfap43+/- & Cfap44+/- & Armc2+/-	13
22	15	14.5	7.25							Cfap43+/- & Cfap44+/-	14.5			Cfap43+/- & Cfap44+/- & Armc2+/-	7.25
9.8	12	15.25	18.8							Cfap43+/- & Cfap44+/-	15.25			Cfap44+/- & Armc2+/- & Ccdc146+/-	18.8
30	5	21.9	26.3							Cfap43+/- & Cfap44+/-	21.9			Cfap43+/- & Armc2+/- & Ccdc146+/-	26.3
8	20	23	23.8							Cfap43+/- & Cfap44+/-	23			Cfap43+/- & Armc2+/- & Ccdc146+/-	23.8
10.2	14.01	10								Cfap43+/- & Cfap44+/-	10
11	10.83	6.5								Cfap43+/- & Cfap44+/-	6.5
10	24.51	20.4								Cfap44+/- & Armc2+/-	20.4
22.5	31	14.4								Cfap44+/- & Armc2+/-	14.4
24	22.75	21.6								Cfap44+/- & Armc2+/-	21.6
10	9	17								Cfap44+/- & Armc2+/-	17
22	20	16.5								Cfap44+/- & Armc2+/-	16.5
24	9.6	16.5								Cfap44+/- & Armc2+/-	16.5
	8.6	10								Cfap44+/- & Armc2+/-	10
	9.2	25								Cfap43+/- & Armc2+/-	25
	17	16.8								Cfap43+/- & Armc2+/-	16.8
	8	15								Cfap43+/- & Armc2+/-	15
	2	9.6								Cfap43+/- & Armc2+/-	9.6
	3	19.2								Cfap43+/- & Armc2+/-	19.2
	21	20								Cfap43+/- & Armc2+/-	20
	10.83	17.5								Cfap43+/- & Armc2+/-	17.5
	6	11.2								Cfap43+/- & Ccdc146+/-	11.2
	27.7	20.3								Armc2+/- & Ccdc146+/-	20.3
	17.4
	24.5
	23
	22.7
	22.5
	22

## Sheet: Time per litter (days)
Wild type (n=16)	1 gene (n=33)	2 genes (n=7)	3 genes (n=7)	4 genes (n=12)						Genotype	2 genes (n=7)			Genotype	3 genes (n=7)
26	20	23	31	26						Cfap43+/- & Cfap44+/-	23			Cfap43+/- & Cfap44+/- & Armc2+/-	31
21	22	24	56	30						Cfap43+/- & Cfap44+/-	24			Cfap43+/- & Cfap44+/- & Armc2+/-	56
39	41	35	23	16						Cfap43+/- & Cfap44+/-	35			Cfap43+/- & Cfap44+/- & Armc2+/-	23
43	24	45	26	26						Cfap43+/- & Cfap44+/-	45			Cfap43+/- & Cfap44+/- & Armc2+/-	26
29	42	24	28	37						Cfap43+/- & Cfap44+/-	24			Cfap43+/- & Cfap44+/- & Armc2+/-	28
45	49	23	17	34						Cfap43+/- & Cfap44+/-	23			Cfap43+/- & Cfap44+/- & Armc2+/-	17
33	33	24	26	26						Cfap43+/- & Cfap44+/-	24			Cfap43+/- & Cfap44+/- & Armc2+/-	26
27	26			22
23	24			33
27	19			33
23	18			35
32	21			21
46	24
27	35
29	24
15	20
	39
	29
	20
	24
	27
	21
	31
	24
	25
	26
	46
	20
	37
	27
	34
	37
	21

## Sheet: Pups per litter
Wild type (n=25)	1 gene (n=33)	2 genes (n=7)	3 genes (n=9)	4 genes (n=12)						Genotype	2 genes (n=7)			Genotype	3 genes (n=9)
7	4	10	8	8						Cfap43+/- & Cfap44+/-	10			Cfap43+/- & Cfap44+/- & Armc2+/-	8
6	9	7	9	9						Cfap43+/- & Cfap44+/-	7			Cfap43+/- & Cfap44+/- & Armc2+/-	9
5	4	7	10	9						Cfap43+/- & Cfap44+/-	7			Cfap43+/- & Cfap44+/- & Armc2+/-	10
7	5	7	6	7						Cfap43+/- & Cfap44+/-	7			Cfap43+/- & Cfap44+/- & Armc2+/-	6
11	5	6	5	6						Cfap43+/- & Cfap44+/-	6			Cfap43+/- & Cfap44+/- & Armc2+/-	5
8	5	9	4	6						Cfap43+/- & Cfap44+/-	9			Cfap43+/- & Cfap44+/- & Armc2+/-	4
10	7	8	4	4						Cfap43+/- & Cfap44+/-	8			Cfap43+/- & Cfap44+/- & Armc2+/-	4
4	4		5	8										Cfap43+/- & Cfap44+/- & Armc2+/-	5
9	7		3	7										Cfap43+/- & Cfap44+/- & Armc2+/-	3
4	4			7
5	10			6
5	9			6
12	15
10	7
9	6
13	7
9	8
7	5
8	6
11	4
6	4
7	10
4	3
2	8
8	7
	6
	4
	10
	9
	9
	8
	9
	8
